# Supplementary material for: Immunogenicity of pneumococcal vaccination in HIV infected individuals: A systematic review and meta-analysis
Source: PubMed Central journal article supplement (PMC7695973; doi:10.1016/j.eclinm.2020.100576), 2020-11-23
Supplement: mmc1.pdf [file mmc1.pdf]

**Supplementary File 1. Full search strategy**

|                                                  |                                                                                                                                                                                                                                                                                     |          |
|--------------------------------------------------|-------------------------------------------------------------------------------------------------------------------------------------------------------------------------------------------------------------------------------------------------------------------------------------|----------|
| Embase Classic+Embase <1947 to 2020 June 10>     |                                                                                                                                                                                                                                                                                     |          |
| Search history sorted by search number ascending |                                                                                                                                                                                                                                                                                     |          |
| #                                                | Searches                                                                                                                                                                                                                                                                            | Type     |
| 1                                                | exp Human immunodeficiency virus/ or exp acquired immune deficiency syndrome/ or exp Human immunodeficiency virus infection/ or (PLWH or HIV* or "Human immunodeficiency virus" or AIDS or Acquired Immunodeficiency Syndrome or AIDS).ti,ab,kw.                                    | Advanced |
| 2                                                | Pneumococcus vaccine/ or ("13-valent pneumococcal vaccine" or "23-valent pneumococcal polysaccharide vaccine" or Prevenar* or PCV13 or PCV7 or PCV10 or pneumovax* or PPSV23 or pneumococcal vaccin* or pneumococcal immune*).ti,ab,kw.                                             | Advanced |
| 3                                                | 1 and 2                                                                                                                                                                                                                                                                             | Advanced |
| 4                                                | (rat or rats or mouse or mice or swine or porcine or murine or sheep or lambs or pigs or piglets or rabbit or rabbits or cat or cats or dog or dogs or cattle or bovine or monkey or monkeys or trout or marmoset\$1).ti. or (Animal experiment/ not (human experiment/ or human/)) | Advanced |
| 5                                                | 3 not 4                                                                                                                                                                                                                                                                             | Advanced |
| 6                                                | exp case report/                                                                                                                                                                                                                                                                    | Advanced |
| 7                                                | 5 not 6                                                                                                                                                                                                                                                                             | Advanced |
| 8                                                | limit 7 to (conference abstracts or embase)                                                                                                                                                                                                                                         | Advanced |

|                                                  |          |      |
|--------------------------------------------------|----------|------|
| Ovid MEDLINE(R) ALL <1946 to June 09, 2020>      |          |      |
| Search history sorted by search number ascending |          |      |
| #                                                | Searches | Type |
|                                                  |          |      |

|   |                                                                                                                                                                                                                                                |   |          |
|---|------------------------------------------------------------------------------------------------------------------------------------------------------------------------------------------------------------------------------------------------|---|----------|
| 1 | exp "HIV"/ or exp "Acquired Immunodeficiency Syndrome"/ or (PLWH or HIV* or "Human immunodeficiency virus" or AIDS or Acquired Immunodeficiency Syndrome or AIDS).ti,ab,kf.                                                                    |   | Advanced |
| 2 | exp "Pneumococcal Vaccines"/ or ("13-valent pneumococcal vaccine" or "23-valent pneumococcal polysaccharide vaccine" or Prevenar* or PCV13 or PCV7 or PCV10 or pneumovax* or PPSV23 or pneumococcal vaccin* or pneumococcal immune*).ti,ab,kf. |   | Advanced |
| 3 | 1 and 2                                                                                                                                                                                                                                        |   | Advanced |
| 4 | case reports.pt.                                                                                                                                                                                                                               |   | Advanced |
| 5 | 3 not 4                                                                                                                                                                                                                                        |   | Advanced |
| 6 | exp animals/ not humans/                                                                                                                                                                                                                       |   | Advanced |
| 7 | 5 not 6                                                                                                                                                                                                                                        | 5 | Advanced |

**Supplementary File 2.** Explanation of Newcastle Ottawa risk of bias assessment tool for cohort studies

| <b>Selection domain</b>                                                  |                                                                                                                                                                                                                                    |
|--------------------------------------------------------------------------|------------------------------------------------------------------------------------------------------------------------------------------------------------------------------------------------------------------------------------|
| Representativeness of exposed cohort (max: ★)                            | Awarded if HIV+ patients were representative for current HIV+ population: approximately 70% males; average age >40 years old; >75% on antiretroviral therapy; mean CD4>400                                                         |
| Selection of non-exposed cohort (max: ★)                                 | Awarded if study had a control group of HIV-negative individuals or unvaccinated HIV+ control group.                                                                                                                               |
| Ascertainment of exposure (max: ★)                                       | Awarded if vaccinations were administered during the study or vaccine administration was registered in the patient file/registry.                                                                                                  |
| Outcome was not present at start of study (max: ★)                       | Awarded if baseline IgG/OPA assessment was done                                                                                                                                                                                    |
| <b>Comparability domain</b>                                              |                                                                                                                                                                                                                                    |
| Comparability of cohorts on the basis of the design or analysis (max ★★) | Awarded if comparative analyses were adjusted/matched for age (1 star) and at least one other important factor such as cART use or CD4 count (2 stars).                                                                            |
| <b>Outcome domain</b>                                                    |                                                                                                                                                                                                                                    |
| Assessment of outcome (max: ★)                                           | Awarded if serological methods were sufficiently described, primary outcomes were predefined and reported and, when applicable if cut-offs for seroconversion/seroprotection were predefined and supported by previous literature. |
| Follow-up long enough(max: ★)                                            | Awarded if post-vaccination antibody assessment was done at least 4 weeks after vaccination.                                                                                                                                       |
| Adequacy of follow-up of cohorts (max: ★)                                | Awarded if loss to follow up or missing data was <10%                                                                                                                                                                              |

Thresholds for converting the NOS rating to Agency for Healthcare Research and Quality - AHRQ - standards (good, fair, and poor):  
 Good quality: 3 or 4 stars in Selection domain AND 1 or 2 stars in Comparability domain AND 2 or 3 stars in Outcome domain  
 Fair quality: 2 stars in Selection domain AND 1 or 2 stars in Comparability domain AND 2 or 3 stars in Outcome domain  
 Poor quality: 0 or 1 star in Selection domain OR 0 stars in Comparability domain OR 0 or 1 stars in Outcome domain



**Supplementary file 3 – Table 1: Additional characteristics of included studies.**

| Study characteristics         |                       |                                                     |                          |                                        |                                                 |                                           |                                   |                                                         | Patient characteristics  |                   |                    | Outcomes                                             |                                                    | Authors contacted for additional data |                                      | Response                     |
|-------------------------------|-----------------------|-----------------------------------------------------|--------------------------|----------------------------------------|-------------------------------------------------|-------------------------------------------|-----------------------------------|---------------------------------------------------------|--------------------------|-------------------|--------------------|------------------------------------------------------|----------------------------------------------------|---------------------------------------|--------------------------------------|------------------------------|
| Study (year) *                | Country               | Design                                              | Serologic methods        | Correlation of protection              | Sero-types assessed                             | Interval vaccination/antibody assessment† | Previous pneumococcal vaccination | Vaccination schedule                                    | Subjects at baseline (n) | Age (mean/median) | VL§ undetectable % | Seroprotection n/total (%)                           | Pre/Post-vaccination concentration of IgG (mcg/ml) |                                       |                                      |                              |
|                               |                       |                                                     |                          |                                        |                                                 |                                           |                                   |                                                         |                          |                   |                    |                                                      | 6B                                                 | 14                                    |                                      |                              |
| Almeida (2009) <sup>23</sup>  | Brazil                | Prospective cohort                                  | ELISA <sup>l</sup>       | NR <sup>†</sup>                        | 1,3,5,6B, 9V,14                                 | 21-78 days (median 40)                    | 0%                                | PPSV23 <sup>#</sup> (pregnant HIV <sup>Δ</sup> + women) | 44                       | 26                | NR                 | NR                                                   | 1.18/3.05                                          | 3.20/9.39                             | No, data available from publication. | NA                           |
| Amendola (2002) <sup>22</sup> | Italy                 | Prospective cohort                                  | ELISA                    | NR                                     | 3,4,6B, 19F, 23F                                | 30 days                                   | NR                                | PPSV23                                                  | 10                       | 37                | NR                 | NR                                                   | 1.9/4.0                                            | NR                                    | Yes                                  | No                           |
|                               |                       |                                                     |                          |                                        |                                                 |                                           |                                   | CD4 <200                                                | 23                       |                   | NR                 | NR                                                   | 2.6/8.5                                            | NR                                    |                                      |                              |
|                               |                       |                                                     |                          |                                        |                                                 |                                           |                                   | CD4 200-500                                             | 24                       |                   | NR                 | NR                                                   | 3.6/4.7                                            | NR                                    |                                      |                              |
|                               |                       |                                                     |                          |                                        |                                                 |                                           |                                   | CD4 >500                                                | 20                       |                   | NR                 | NR                                                   | 1.3/2.9                                            | NR                                    |                                      |                              |
| Belmonti (2019) <sup>24</sup> | Italy                 | Follow up Lombardi et al (2016); Prospective cohort | ELISA                    | IgG ≥1.0 mcg/ml for ≥9 serotypes (70%) | 1,3,4,5, 6A, 6B, 7F, 9V, 14, 18C, 19A, 19F, 23F | 5 years                                   | 0%                                | PCV13 <sup>o</sup> +PCV13 (wk 0, 8)                     | 50                       | 44                | 92%                | 23/42 (55)                                           | 1.38 / 2.57                                        | 5.75 / 9.12                           | Yes                                  | No                           |
|                               |                       |                                                     |                          |                                        |                                                 |                                           |                                   | PPSV23 (wk0)                                            | 50                       | 46                | 84%                | 24/49 (49)                                           | 1.55 / 1.74                                        | 6.92 / 11.5                           |                                      |                              |
| Bhorat (2015) <sup>25</sup>   | South Africa, Romania | Prospective cohort                                  | ELISA + OPA <sup>l</sup> | NR                                     | 1,3,4,5,6A,6B, 7F, 9V, 14, 18C, 19A, 19F, 23F   | 1,2,3,4 months                            | 0%                                | 3x PCV13 (mo 0,1,2) + PPSV23 (mo 3)                     | 151 adults               | 41                | 71%                | NR                                                   | 3.13 / 8.25                                        | 2.45 / 16.24                          | Yes                                  | No                           |
| Chang (2000) <sup>26</sup>    | United States         | Prospective cohort                                  | ELISA                    | NR                                     | Total PPSV23 antipneumococcal IgG (ELISA)       | 28 days                                   | 0%                                | PPSV23 HIV+                                             | 12                       | 41                | 50%                | NR                                                   | <i>Inverse IgG titer 11.000 (from graph)</i>       |                                       | Yes                                  | Yes, but data not available. |
|                               |                       |                                                     |                          |                                        |                                                 |                                           |                                   | HIV- controls                                           | 10                       | 35                | NA                 | NR                                                   | <i>Inverse IgG titer 40.000 (from graph)</i>       |                                       |                                      |                              |
| Cheng (2016) <sup>46</sup>    | Taiwan                | Prospective cohort (follow-up Lu 2012)              | ELISA                    | IgG ≥1.0 mcg/ml                        | 6B, 14, 19F, 23F                                | 2,3,4 5 years                             | 0%                                | PCV7 (wk0)                                              | 109                      | 36                | 44%                | 6B: 85/102 (83); 19F: 101/102 (99); 23F: 69/102 (68) | 0.855/ 1.79                                        | 1.992 / 6.98                          | No, data available from publication. | NA                           |
|                               |                       |                                                     |                          |                                        |                                                 |                                           |                                   | PCV7+PCV7 (wk0,4)                                       | 112                      | 36                | 44%                | 6B: 82/103 (80) 19F: 97/103 (94) 23F: 76/103 (74)    | 0.774/ 1.73                                        | 1.91 / 8.22                           |                                      |                              |

|                                     |                |                                        |             |             |                                                 |                      |                               |                               |     |    |      |                               |                     |                      |     |                                                                     |
|-------------------------------------|----------------|----------------------------------------|-------------|-------------|-------------------------------------------------|----------------------|-------------------------------|-------------------------------|-----|----|------|-------------------------------|---------------------|----------------------|-----|---------------------------------------------------------------------|
| Crum-Cianflone (2010) <sup>48</sup> | United States  |                                        | ELISA       |             |                                                 |                      | 100% of HIV+                  | PPSV23 HIV+                   | 73  | 42 | 64%  | NR                            | NR                  | 1.0/2.0 (from graph) | Yes | No                                                                  |
|                                     |                | RCT <sup>er</sup>                      |             | ≥1.0 mcg/ml | 4, 9V, 14, 19F                                  | 14 days, 2, 6 months |                               | PCV7 HIV+                     | 131 | 42 | 70%  | NR                            | NR                  | 1.2/3.3 (from graph) |     |                                                                     |
|                                     |                |                                        |             |             |                                                 |                      | 0% HIV-                       | PCV HIV-                      | 25  | 37 | NR   | NR                            | NR                  | 0.1/4.8 (from graph) |     |                                                                     |
| Deloria-Knoll (2006) <sup>50</sup>  | United States  | RCT (Vitamin A, Zinc, both or Placebo) | ELISA       | NR          | 4, 6B, 9V, 14, 18C, 19F, 23F                    | 1,6,7 months         | 0%                            | PCV 7 + PPSV23 (mo 0, mo 6)   | 118 | 42 | 13%  | NR                            | 1.47-3.21/2.96-7.09 | NR                   | Yes | Yes                                                                 |
| Falco (2006) Vaccine <sup>27</sup>  | Spain          | Prospective cohort                     | ELISA       | NR          | 1, 6B, 14, 19F, 23F                             | 1, 12 months         | 0%                            | PPSV23 (HIV+)                 | 113 | 39 | 79%  | NR                            | 5.99 / 7.64         | 3.6 / 12.1           | Yes | Yes                                                                 |
|                                     |                |                                        |             |             |                                                 |                      |                               | PPSV23 (HIV-)                 | 30  | 34 |      |                               | 2.95 / 5.45         | 1.82 / 7.55          |     |                                                                     |
| Farmaki (2018) <sup>5</sup>         | Greece         | Prospective cohort                     | ELISA       | NR          | 3,14                                            | 1, 13 months         | 70% between 1-5 years earlier | PCV13+PPSV23 (0,12 mo)        | 40  | 51 | 100% | NR                            | NR                  | 1.21 / 4.27          | Yes | Yes                                                                 |
| Feikin (2001) <sup>51</sup>         | United States  | RCT                                    | ELISA + OPA | NR          | 4, 6B, 9V, 14, 23F                              | 8,9,16,17,24 weeks   | 0% in 5 years prior to study  | PCV7+PCV7 (0,8wk)             | 15  | 45 | NR   | NR                            | 0.99/2.0            | 5.0 / 10.3           | Yes | No                                                                  |
|                                     |                |                                        |             |             |                                                 |                      |                               | PCV7+PPSV23 (0,8wk)           | 18  | 42 | NR   | NR                            | 1.2 / 2.2           | 5.0 / 11.4           |     |                                                                     |
|                                     |                |                                        |             |             |                                                 |                      |                               | Placebo+PPSV23 (0,8wk)        | 16  | 41 | NR   | NR                            | 1.2 / 1.6           | 7.3 / 15.4           |     |                                                                     |
|                                     |                |                                        |             |             |                                                 |                      |                               | 2 doses of placebo (0,8wk)    | 18  | 44 | NR   | NR                            | 1.0/1.0             | 3.8/3.9              |     |                                                                     |
| Glesby (2015) <sup>28</sup>         | United States  | Prospective cohort                     | ELISA + OPA | NR          | 1,3,4,5, 6A, 6B, 7F, 9V, 14, 18C, 19A, 19F, 23F | 1,7,13 months        | Yes 100% PPSV23               | PCV13+PCV13+PCV13 (0,6,12 mo) | 329 | 47 | 74%  | NR                            | 1.17 / 5.48         | 2.40 / 8.13          | Yes | Yes, but data owned by Pfizer could not be provided unconditionally |
| Hart (2007) <sup>29</sup>           | United Kingdom | Prospective cohort                     | ELISA       | ≥225 U/ml   | Total PPSV23 anti-pneumococcal IgG and IgM      | 1, 3-6 months        | NR                            | PPSV23 HIV+                   | 33  | 46 | 100% | 7/18 (39)                     | NR                  | NR                   | Yes | No                                                                  |
|                                     |                |                                        |             |             |                                                 |                      |                               | HIV- controls                 | NR  | 31 | NR   | 7/8 (88)                      | NR                  |                      |     |                                                                     |
| Ho (2013) <sup>52</sup>             | Brazil         | Randomised clinical trial              | ELISA       | ≥1.00mcg/ml | 6B, 9V, 14                                      | 2,6 months           |                               | PPSV23+Placebo (mo 0, mo 2)   | 111 | 40 | 64%  | 6B: 47/89 (53) 14: 79/89 (89) | 0.73/1.02           | 1.82 / 6.72          | Yes | No                                                                  |

|                                 |                          |                                                          |                |                                         |                                                    |                                 |                                     |                         |     |     |                                     |                                         |                |               |                                                                    |
|---------------------------------|--------------------------|----------------------------------------------------------|----------------|-----------------------------------------|----------------------------------------------------|---------------------------------|-------------------------------------|-------------------------|-----|-----|-------------------------------------|-----------------------------------------|----------------|---------------|--------------------------------------------------------------------|
|                                 |                          |                                                          |                |                                         |                                                    | 0%                              | PCV7/Placebo<br>(mo 0, mo 2)        | 110                     | 40  | 67% | 6B: 45/91<br>(50) 14:<br>76/89 (84) | 0.51 /<br>1.24                          | 1.15 /<br>9.32 |               |                                                                    |
|                                 |                          |                                                          |                |                                         |                                                    |                                 | PCV7/PPSV23<br>(mo 0, mo 2)         | 110                     | 42  | 73% | 6B: 54/91<br>(59) 14:<br>77/91 (85) | 0.57 /<br>1.76                          | 1.40 /<br>6.35 |               |                                                                    |
| Horster<br>(2010) <sup>30</sup> | Germany                  | Prospective cohort                                       | ELISA          | NR                                      | Total<br>PPSV23<br>antipneumococcal IgG<br>(ELISA) | 1-13<br>months<br>(median<br>4) | Not in 5<br>years prior<br>to study | PPSV23                  | 100 | 40  | NR                                  | NR                                      | NR             | NR            | No, data<br>available<br>from<br>publicati<br>on. NA               |
| Huang<br>(2018) <sup>31</sup>   | China                    | Prospective cohort                                       | OPA            | NR                                      | 6B, 19A,<br>19F, 23F                               | 1 month                         | 0%                                  | PPSV23 (HIV+)           | 63  | 38  | NR                                  | NR                                      | 27/901         | NR            | No<br>(method<br>s not<br>suitable<br>for<br>meta-<br>analysis) NA |
|                                 |                          |                                                          |                |                                         |                                                    |                                 |                                     | PPSV23 (HIV-)           | 56  | 64  | NA                                  |                                         | 85/265<br>0    | NR            |                                                                    |
| Hung<br>(2010) <sup>32</sup>    | Taiwan                   | Prospective cohort,<br>follow-up<br>report of<br>Lu 2013 | ELISA          | ≥0.35<br>mcg/ml                         | 14, 19F, 23F                                       | 5 years                         | 0%                                  | PPSV23<br>CD4 <100      | 35  | 39  | 77%                                 | 14: 30%;<br>23F: 10%<br>(from<br>graph) | NR             |               | Yes,<br>however<br>requested<br>data not<br>available.<br><br>Yes  |
|                                 |                          |                                                          |                |                                         |                                                    |                                 |                                     | CD4 100-199             | 36  | 41  | 91%                                 | 14: 60%;<br>23F: 30%<br>(from<br>graph) | NR             |               |                                                                    |
|                                 |                          |                                                          |                |                                         |                                                    |                                 |                                     | CD4 200-349             | 34  | 42  | 94%                                 | 14: 55%;<br>23F: 30%<br>(from<br>graph) | NR             |               |                                                                    |
|                                 |                          |                                                          |                |                                         |                                                    |                                 |                                     | CD4 ≥350                | 64  | 39  | 81%                                 | 14: 60%;<br>23F: 35%<br>(from<br>graph) | NR             |               |                                                                    |
| Kang<br>(2016) <sup>33</sup>    | United Kingdom           | Retrospective cohort                                     | NR             | ≥0.35<br>mcg/ml<br>for ≥ 6<br>serotypes | NR                                                 | NR                              | NR                                  | PPSV23                  | 435 | 43  | NR                                  | 258/435<br>(59)                         | NR             | Yes           | No                                                                 |
| Leggat<br>(2015) <sup>34</sup>  | United States of America | Prospective cohort                                       | ELISA +<br>OPA | NR                                      | 14, 23F                                            | 1 month                         | 0%                                  | PPSV23<br>CD4>200 cART- | 20  | 28  | NR                                  | NR                                      | NR             | 5.2 /<br>27.8 | Yes, but<br>data could<br>not be<br>provided<br>timely             |
|                                 |                          |                                                          |                |                                         |                                                    |                                 |                                     | CD4<200 cART-           | 12  | 36  | NR                                  | NR                                      | NR             | 6.9 /<br>26.0 |                                                                    |

|                                       |                |                                                                                               |                         |                                      |                                                    |                             |                                                      | CD4<200 cART+            | 11  | 45 | NR  | NR                                           | NR          | 5.0/ 9.6     |     |                                            |
|---------------------------------------|----------------|-----------------------------------------------------------------------------------------------|-------------------------|--------------------------------------|----------------------------------------------------|-----------------------------|------------------------------------------------------|--------------------------|-----|----|-----|----------------------------------------------|-------------|--------------|-----|--------------------------------------------|
|                                       |                |                                                                                               |                         |                                      |                                                    |                             |                                                      | HIV- controls            | 22  | 26 | NR  | NR                                           | NR          | NR           |     |                                            |
| <b>Lesprit (2007)</b> <sup>53</sup>   | France         | RCT                                                                                           | ELISA                   | ≥1.00mcg/ml                          | 1,4,5 6B, 9V, 14, 18C, 19F, 23F                    | <b>8 weeks, 24 weeks</b>    | Not in 5 years prior to study                        | PCV7+PPSV23 (wk 0, wk 4) | 105 | 44 | 66% | NR                                           | 0.47/ 2.18  | 1.68 / 9.34  |     |                                            |
|                                       |                |                                                                                               |                         |                                      |                                                    |                             |                                                      | PPSV23 (wk4)             | 103 | 45 | 58% | NR                                           | 0.47/ 1.55  | 1.07 / 5.88  | Yes | Yes                                        |
| <b>Lombardi (2016)</b> <sup>13</sup>  | Italy          | Prospective cohort                                                                            | ELISA                   | ≥1.0 mcg/ml                          | 1,3,4,5,6A, 6B, 7F, 9V, 14, 18C, 19A, 19F, 23F;    | <b>8,24,48 weeks</b>        | 0%                                                   | PCV13+PCV13 (wk 0, 8)    | 50  | 44 | 84% | 6B 44/46 (96); 14 45/46 (98) 23F 43/46 (93)  | 1.41 / 4.05 | 5.59 / 15.11 |     |                                            |
|                                       |                |                                                                                               |                         |                                      |                                                    |                             |                                                      | PPSV23 (wk0)             | 50  | 46 | 92% | 6B 44/49 (90);14 49/49 (100); 23F 44/49 (90) | 1.53 / 2.69 | 6.69/18 .69  | Yes | Yes                                        |
| <b>Lu (2012)</b> <sup>36</sup>        | Taiwan         | Prospective cohort                                                                            | ELISA                   | ≥1.00mcg/ml                          | 6B, 14, 19F, 23F                                   | <b>12, 24, 36, 48 weeks</b> | 0%                                                   | PCV7 (wk 0)              | 114 | 38 | 46% | NR                                           | NR          | NR           |     | Yes, however requested data not available. |
|                                       |                |                                                                                               |                         |                                      |                                                    |                             |                                                      | PCV7+PCV7 (wk 0 ,wk 4)   | 115 | 37 | 46% | NR                                           | NR          | NR           | Yes |                                            |
| <b>Lu (2014)</b> <sup>35</sup>        | Taiwan         | Prospective cohort (follow-up Hung 2010)                                                      | ELISA                   | ≥1.00mcg/ml                          | 6B, 14, 19F, 23F                                   | <b>12, 24, 36, 48 weeks</b> | Yes 100% received PPSV23 5 years earlier (Hung 2010) | PPSV23 (wk 0)            | 127 | 45 | 83% | NR                                           | NR          | NR           |     |                                            |
|                                       |                |                                                                                               |                         |                                      |                                                    |                             |                                                      | PCV7 (wk 0)              | 50  | 44 | 82% | NR                                           | NR          | NR           |     | Yes, however requested data not available. |
|                                       |                |                                                                                               |                         |                                      |                                                    |                             |                                                      | PCV7+PCV7 (wk 0 ,wk 4)   | 44  | 43 | 84% | NR                                           | NR          | NR           | Yes |                                            |
| <b>Lu (2013)</b> <sup>37</sup>        | Taiwan         | Prospective cohort (PPSV23 arm = same cohort as Hung 2010; PCV7 arm = same cohort as Lu 2012) | ELISA                   | NR                                   | 6B, 14, 19F, 23F                                   | <b>24, 48 weeks</b>         | 0%                                                   | PPSV23                   | 169 | 39 | 84% | NR                                           | NA          | 2.35/ 3.14   | Yes | Yes, however requested data not available. |
|                                       |                |                                                                                               |                         |                                      |                                                    |                             |                                                      | PCV7                     | 114 | 39 | 59% | NR                                           | 0.76 / 1.06 | 1.83/5.00    |     |                                            |
| <b>MacLennan (2016)</b> <sup>38</sup> | United Kingdom | Prospective cohort                                                                            | Multiple x fluorescence | ≥1.3 mcg/ml for 8/12 serotypes (67%) | 1, 3, 4, 5, 6B, 7F, 9V, 14, 18C, 19A, 19F, and 23F | <b>4-6 weeks</b>            | 0%                                                   | PPSV23 (HIV+)            | 211 | 35 | 73% | 6B: 44%   14: 75%   23F: 43% Overall: 33%    | 0.32 / 0.97 | 1.51 / 5.12  | Yes | No                                         |



|                                         |               |                                                   |                 |                                                               |             |                                       |                                           |                                                 |     |     |      |                                           |                           |                    |                                            |    |
|-----------------------------------------|---------------|---------------------------------------------------|-----------------|---------------------------------------------------------------|-------------|---------------------------------------|-------------------------------------------|-------------------------------------------------|-----|-----|------|-------------------------------------------|---------------------------|--------------------|--------------------------------------------|----|
|                                         |               |                                                   | microbead assay |                                                               |             |                                       |                                           |                                                 |     |     |      | 6B: 55%   14: 74%   23F: 63% Overall: 53% | 0.36 / 1.03 / 1.67 / 7.76 |                    |                                            |    |
| Ohtola (2016) <sup>39</sup>             | United States | Prospective cohort                                | ELISA + OPA     | PCV13/PPSV23: 14, 23F                                         | ≥1.00mcg/ml | 1 month after PPSV23                  | 87% HIV+; 7% HIV- >5 years prior to study | PPSV23 (HIV-)                                   | 73  | 40  |      |                                           |                           |                    |                                            |    |
|                                         |               |                                                   |                 |                                                               |             |                                       |                                           | PPSV23 (HIV+)                                   | 22  | 55  | 100% | NR                                        | NR                        | NR (only in graph) | Yes, but data could not be provided timely |    |
|                                         |               |                                                   |                 |                                                               |             |                                       |                                           | PCV13+PPSV23 (wk 0, 8 HIV+)                     | 15  | 55  | 100% | NR                                        |                           | NR (only in graph) |                                            |    |
| PCV13+PPSV23 (wk 0, 8 HIV-)             | 14            | 57                                                | NA              | NR                                                            |             | NR (only in graph)                    |                                           |                                                 |     |     |      |                                           |                           |                    |                                            |    |
| Payeras (2002) <sup>40</sup>            | Spain         | Prospective cohort                                | ELISA + OPA     | Total PPSV23 antipneumococcal IgG (ELISA); OPA for serotype 3 | NR          | 4 weeks                               | 0%                                        | PPSV23 (HIV+ and recurrent bacterial infection) | 33  | 35  | NR   | NR                                        | 874 U/ml                  |                    |                                            |    |
|                                         |               |                                                   |                 |                                                               |             |                                       |                                           | PPSV23 (HIV+ controls)                          | 33  | 37  | NR   | NR                                        | 1265 U/ml                 |                    |                                            |    |
|                                         |               |                                                   |                 |                                                               |             |                                       |                                           | PPSV23 (HIV-)                                   | NR  | NR  | NA   | NR                                        | 2501 U/ml                 | Yes                | No                                         |    |
| Peñaranda (2010) <sup>54</sup>          | Spain         | RCT                                               | ELISA           | 4, 6B, 9V, 14, 18C, 19F, 23F;                                 | ≥1.00mcg/ml | 4, 8 weeks                            | 0%                                        | PCV7/PPSV23 (wk0, wk4)                          | 110 | 44  | 100% | NR                                        | NR                        | NR                 |                                            |    |
|                                         |               |                                                   |                 |                                                               |             |                                       |                                           | PPSV23 (wk 0)                                   | 110 | 44  | 100% | NR                                        | NR                        | NR                 | Yes                                        | No |
| Rash (2015) <sup>41</sup>               | Canada        | Prospective cohort                                | NR              | NR                                                            | ≥1.3 mcg/ml | 4 weeks                               | NR                                        | PPSV23                                          | 23  | NR  | 100% | NR                                        | NR                        | NR                 | Yes                                        | No |
| Rodriguez-Barradas (2003) <sup>42</sup> | United States | Prospective cohort                                | ELISA           | 4-12 weeks                                                    | NR          | n=41 (analysed separately)            | PPSV23 (cART+), first time                | 46                                              | 47  | 46% | NR   | 0.76 / 1.40                               | NR                        |                    |                                            |    |
|                                         |               |                                                   |                 |                                                               |             |                                       | PPSV23 (cART+) second time                | 41                                              | 47  | 46% | NR   | 0.96 / 1.95                               | NR                        |                    |                                            |    |
|                                         |               |                                                   |                 |                                                               |             |                                       | PPSV23 (cART-)                            | 38                                              | 42  | 0   | NR   | 0.88 / 3.12                               | NR                        | Yes                |                                            |    |
| Rodriguez-Barradas (2015) <sup>49</sup> | United States | RCT (immediate versus delayed PPSV23 vaccination) | ELISA + OPA     | 1,3,4, 6B, 23F                                                | ≥1.0 mcg/ml | 1,6,12 months after each intervention | PPSV23 > 3 years earlier 20%              | PPSV23/Placebo (mo 0, mo 9-12)                  | 36  | 44  | 0%   | NR                                        | 5.12 / 7.85               | NR                 |                                            |    |
|                                         |               |                                                   |                 |                                                               |             |                                       |                                           | Placebo/PPSV23 (mo 0, mo 9-12)                  | 36  | 45  | 60%  | NR                                        | 5.17 / 5.79               |                    | Yes                                        |    |
| Rossheim (2016) <sup>43</sup>           | United States | Prospective cohort                                | ELISA           | 3, 6A, 7F, 19A                                                | NR          | 1, 12 months                          | 100% PPSV23 prior to study                | PCV13 (PPSV23 1-3 years earlier)                | 42  | 46  | 100% | NR                                        | NR                        | NR                 |                                            |    |
|                                         |               |                                                   |                 |                                                               |             |                                       |                                           | PCV13 (PPSV23 >3 years earlier)                 | 54  | 42  | 100% | NR                                        | NR                        | NR                 | Yes                                        |    |
| Sadlier (2016) <sup>55</sup>            | Ireland       | RCT                                               | ELISA + OPA     | 1,3,4,5, 6B, 7F, 9V, 14,                                      | ≥1.0 mcg/ml | 8, 28 weeks                           | 0%                                        | PCV13+PPSV23 (wk 0, 4)                          | 28  | 37  | NR   | NR                                        | 0.18/ 1.56                | 0.44 / 4.61        | Yes                                        | No |

|                                          |               |                                           |                |                 |                                                                              |                 |                                 |                                                 |           |         |      |               |             |             |                                             |                                      |
|------------------------------------------|---------------|-------------------------------------------|----------------|-----------------|------------------------------------------------------------------------------|-----------------|---------------------------------|-------------------------------------------------|-----------|---------|------|---------------|-------------|-------------|---------------------------------------------|--------------------------------------|
|                                          |               |                                           |                |                 | 18C, 19A, 19F, 23F                                                           |                 |                                 | PPSV23 (wk 4)                                   | 33        | 36      | NR   | NR            | 0.18 / 0.81 | 1.04 / 5.71 |                                             |                                      |
| <b>Sögaard (2010)</b> <sup>47</sup>      | Denmark       | RCT                                       | ELISA + OPA    | ≥1.0 mcg/ml     | <b>PCV7/PPSV23</b> : 4,6B, 9V, 14, 18C, 19F, 23F; <b>PPSV23</b> : 1, 7F, 19A | 3,4,9,10 months | n=3 PPSV23 (>5 years earlier)   | PCV7/PCV7/PPSV23 (mo 0, 3,9)+placebo            | 49        | 49      | 100% | NR            | 1.23 / 4.07 | 2.38 / 10.1 | Yes                                         | Yes                                  |
|                                          |               |                                           |                |                 |                                                                              |                 |                                 | PCV7/PCV7/PPSV23 (mo 0, 3,9) + CPG7909 adjuvans | 48        | 49      | 100% | NR            | 1.03 / 5.21 | 1.92 / 9.76 |                                             |                                      |
| <b>Slyter (2013)</b> <sup>14</sup>       | Canada        | RCT Immediate versus delayed immunization | ELISA + OPA    | NR              | <b>PCV7/PPSV23</b> : 4, 6B, 9V, 14, 18C, 19F, 23F                            | 1,6,12 months   | 0%                              | PCV7 (immediate/delayed)                        | (23   16) | (43 42) | NR   | NR            | 0.20/ 0.55  | 0.25 / 0.92 | Yes                                         | Yes                                  |
|                                          |               |                                           |                |                 |                                                                              |                 |                                 | PPSV23 (immediate/delayed)                      | (19   21) | (40 38) | NR   | NR            | 0.14 / 0.43 | 0.25 / 0.80 |                                             |                                      |
| Song (2019) <sup>44</sup>                | Korea         | Prospective cohort                        | Multiple x OPA | OPA titer ≥1:64 | 5,6B,18C, 19A                                                                | 21-35 days      | 0%                              | PCV13 (CD4 >350)                                | 34        | 41      | 62%  | 34/34 (100)   | NR          | NR          | No (methods not suitable for meta-analysis) | NA                                   |
|                                          |               |                                           |                |                 |                                                                              |                 |                                 | PCV13 (CD4<350)                                 | 33        | 42      | 52%  | 29/33 (88)    | NR          | NR          |                                             |                                      |
| <b>Tasker (2002)</b> <sup>57</sup>       | United States | RCT / Prospective cohort study (combined) | ELISA          | NR              | 4, 6B, 9V, 14                                                                | 6,12 weeks      | n= 85 (>5 years prior to study) | PPSV23 first time (cART-)                       | 14        | 27      | 0%   | NR            | NR          | NR          | Yes, however data not available             | Yes                                  |
|                                          |               |                                           |                |                 |                                                                              |                 |                                 | PPSV23 second time (cART+)                      | 56        | 26      | NR   | NR            | NR          |             |                                             |                                      |
|                                          |               |                                           |                |                 |                                                                              |                 |                                 | Placebo (second time cART+)                     | 29        | 37      | NR   | NR            | NR          |             |                                             |                                      |
| <b>Tsachouridou (2015)</b> <sup>45</sup> | Greece        | Prospective cohort                        | ELISA          | NR              | Total PPSV23 antipneumococcal IgG                                            | 4, 48 weeks     | 0%                              | PPSV23 (cART+)                                  | 35        | 33      | NR   | NR            | NR          | NR          | Yes                                         | No                                   |
|                                          |               |                                           |                |                 |                                                                              |                 |                                 | PPSV23 (cART-)                                  | 31        | 30      | NR   | NR            | NR          |             |                                             |                                      |
| NCT02717494 (2020) <sup>56</sup>         | Brazil        | RCT (pregnant HIV+ women)                 | ELISA          | ≥0.35 mcg/ml    | NR                                                                           | 4 weeks         | 0%                              | PCV10                                           | 115       | 27      | NR   | 114/114 (100) | NR          | NR          | Yes                                         | Yes, but data could not be provided. |
|                                          |               |                                           |                |                 |                                                                              |                 |                                 | PPSV23                                          | 115       | 28      | NR   | 109/110 (99)  | NR          | NR          |                                             |                                      |
|                                          |               |                                           |                |                 |                                                                              |                 |                                 | Placebo                                         | 116       | 28      | NR   | 106/113 (94)  | NR          | NR          |                                             |                                      |

Legend supplementary table 1

\* Studies printed in bold were included in the meta-analysis

† If multiple time-points were assessed, results are shown for the bold printed time-point

‡ cART= combination antiretroviral treatment, defined as a combination of at least antiretroviral drugs

§ VL= viral load, undetectable viral load was defined as a value below the lowest level of detection in individual studies

| ELISA= Enzyme-Linked Immuno Sorbent assay

¶ NR = not reported

# PPSV23 = 23-valent pneumococcal polysaccharide vaccine

Δ HIV= human Immunodeficiency virus

◇ PCV= pneumococcal conjugate vaccine

↓ OPA= opsonophagocytic assay

☒ RCT = Randomized clinical trial

**Supplementary figure 1: Forest plot of studies comparing seroconversion rates for the pneumococcal conjugated vaccine (PCV) versus the pneumococcal polysaccharide vaccine (PPSV) – fixed effects model (corresponding to figure 5)**

**A Serotype 6 B**

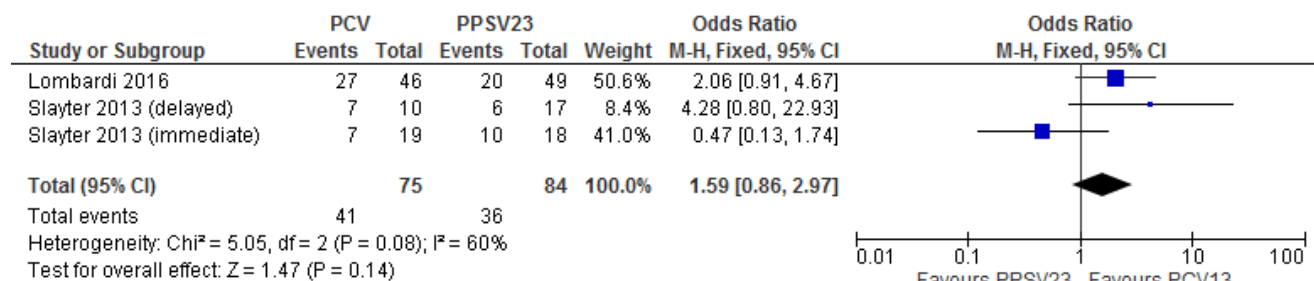

**B Serotype 14**

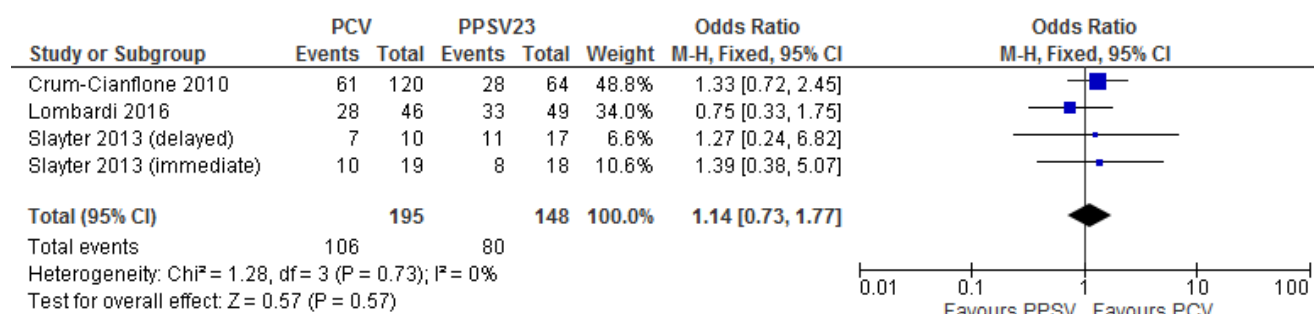

**C Overall**

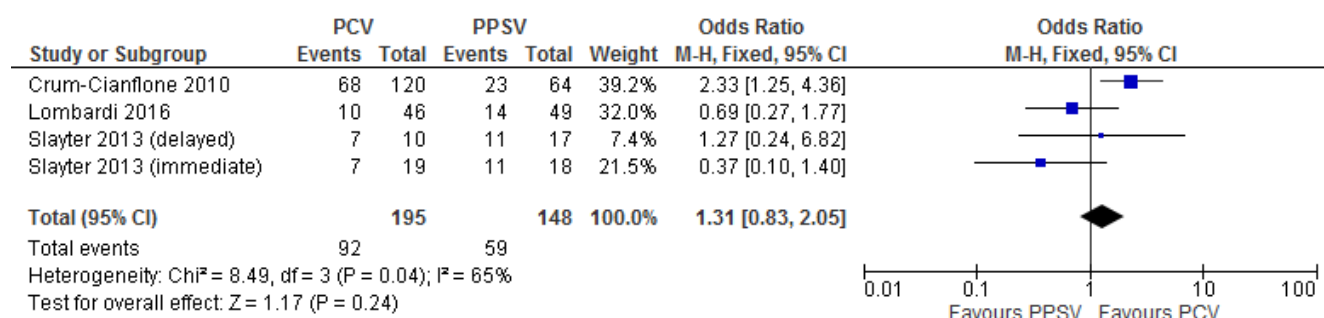

**Supplementary figure 2: Forest plot of studies comparing seroconversion rates for the combined pneumococcal vaccination schedule (PCV+PPSV) versus the pneumococcal polysaccharide vaccine (PPSV) alone – fixed effects model (corresponding to figure 6)**

**A Serotype 6B**

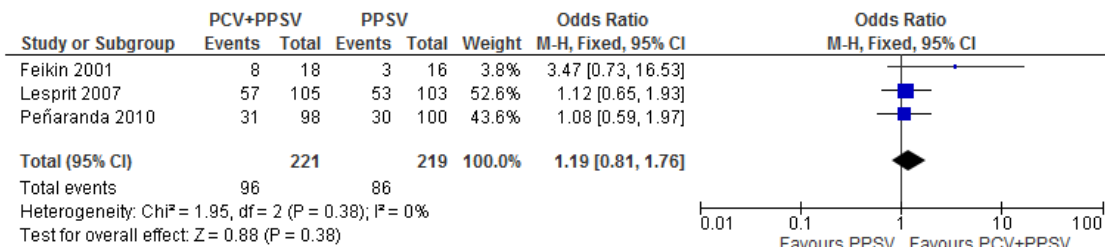

**B Serotype 14**

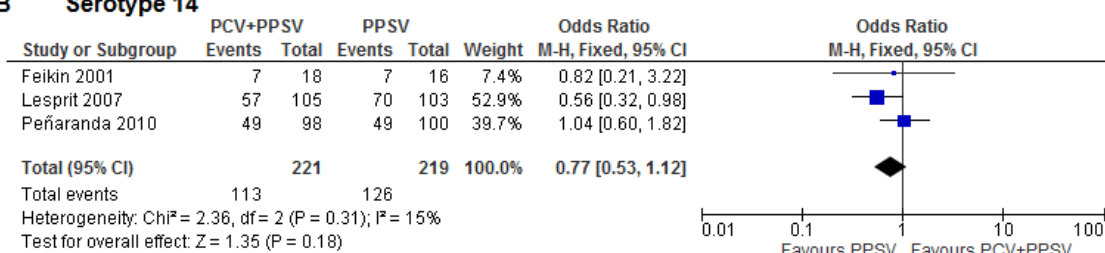

**C Overall**

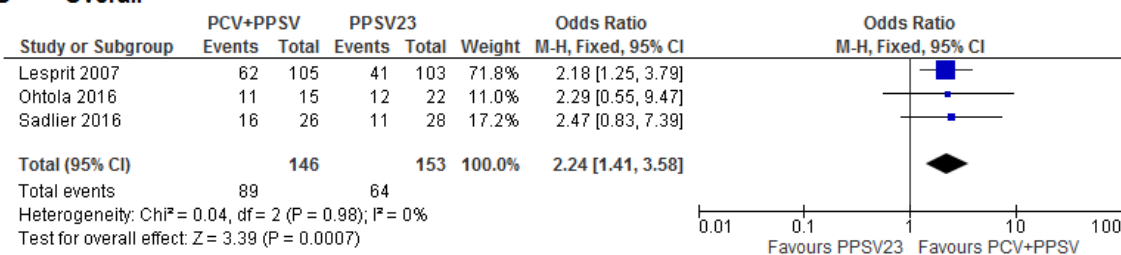

**Supplementary figure 3: Forest plot of studies showing comparison of log-transformed geometric mean concentrations of IgG of serotype 6B (A and B) and serotype 14 (B and C) for the pneumococcal conjugated vaccine (PCV) versus the pneumococcal polysaccharide vaccine (PPSV)**

**Serotype 6B Baseline**

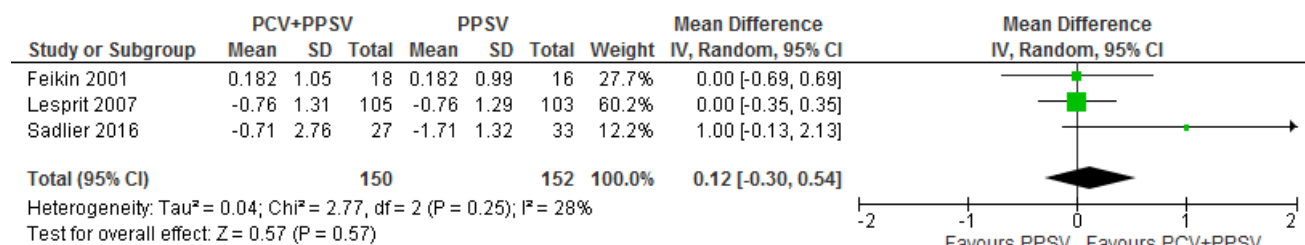

**Serotype 6B Post-vaccination**

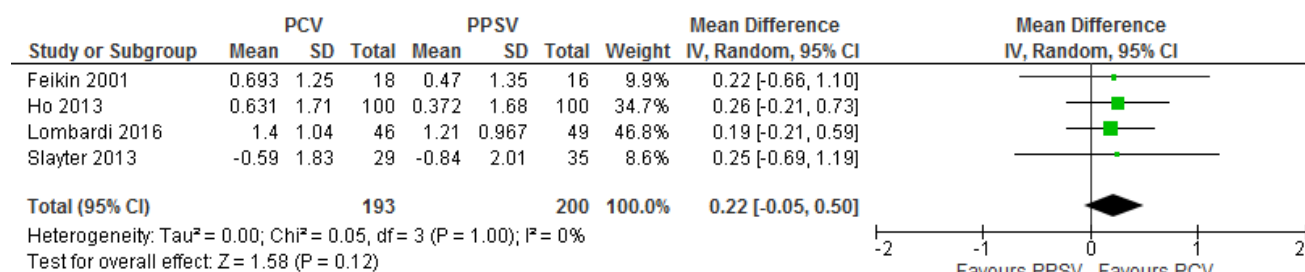

**Serotype 14 Baseline**

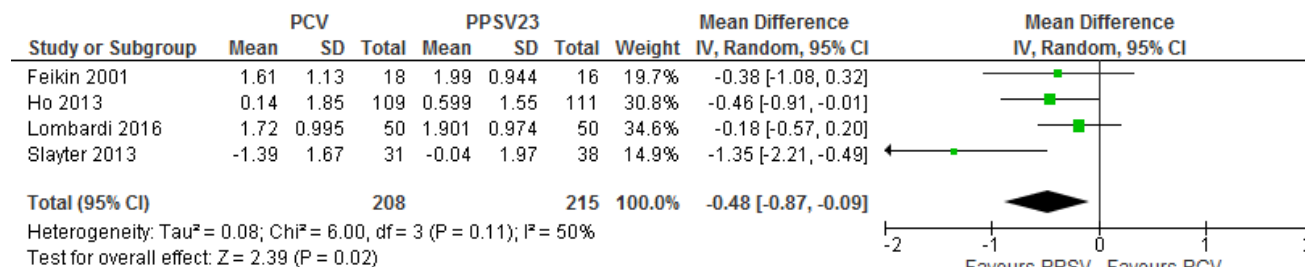

**Serotype 14 Post-Vaccination**

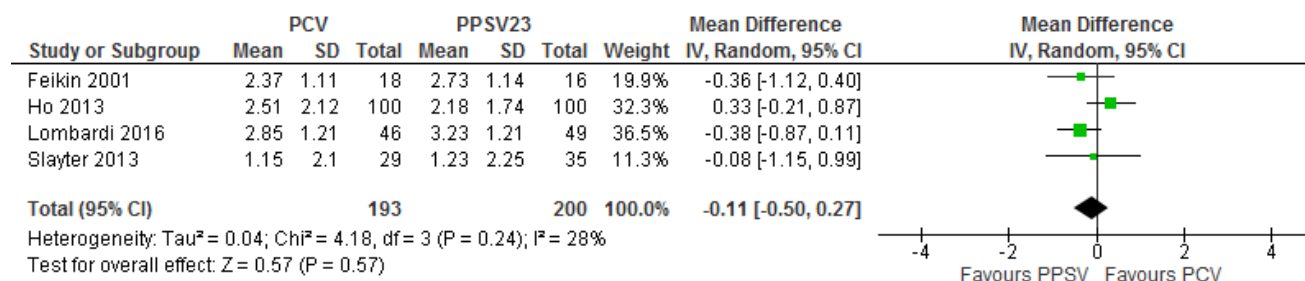

**Supplementary figure 4: Forest plot showing comparison of log-transformed geometric mean concentrations of IgG of serotype 6B (A and B) and serotype 14 (B and C) for the combined vaccination schedule (PCV+PPSV) versus the pneumococcal polysaccharide vaccine (PPSV) alone.**

**A 6B Baseline**

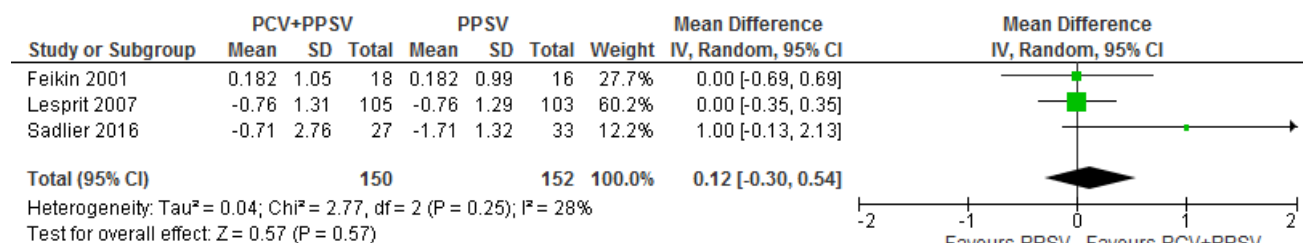

**B 6B Post-vaccination**

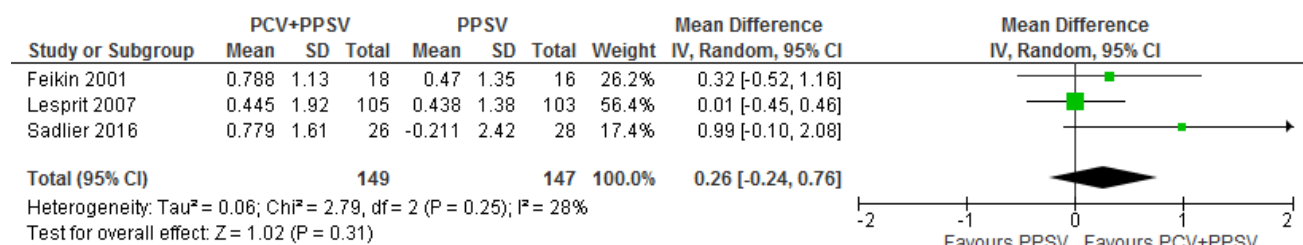

**C 14 Baseline**

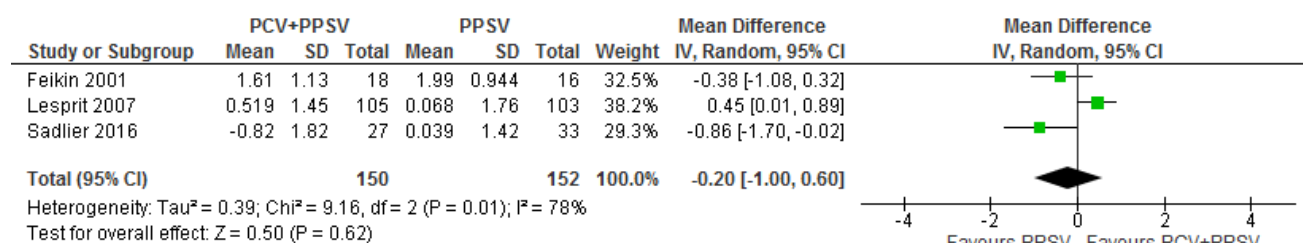

**D 14 Post- Vaccination**

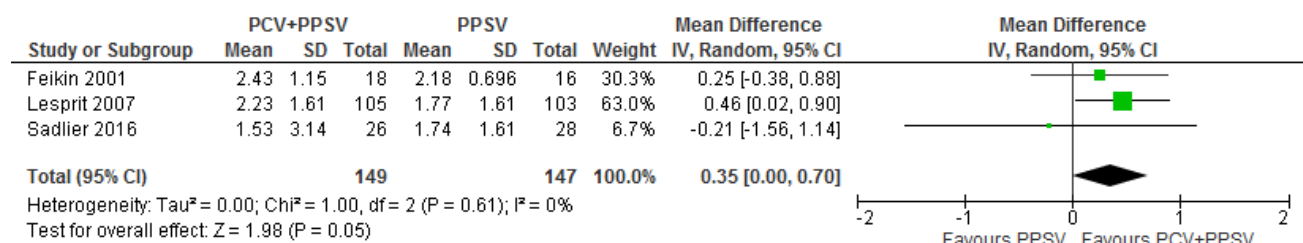

### **Box 1: Research questions**

The proposed systematic review sought to answer the following research questions:

- What is the immunologic response to pneumococcal vaccines (polysaccharide, conjugate or both) in adult PLWH, either expressed in seroconversion rate (SCR), or geometric mean concentration (GMC) of anti-pneumococcal IgG levels, or opsonophagocytic activity (OPA)?
- Does the response to vaccination differ between different pneumococcal vaccination schedules?
- Does the response to vaccination differ between subgroups of PLWH, based on CD4 count, viral load and/or cART use?
- Is the immunologic response to vaccination durable in PLWH?

### **Box 2: Eligibility criteria**

The following studies were included in the systematic review:

- o Randomized controlled trials (RCT), prospective, and retrospective cohort studies, in which at least one dose of pneumococcal vaccine (either conjugate, or polysaccharide or both) was administered to adult PLWH.
- o Studies performed in the era of advanced antiretroviral therapy, which is after the year 2000, when combination antiretroviral therapy became universally recommended.
- o Studies reporting vaccine immunogenicity outcomes, including seroconversion rate (SCR), geometric mean anti-pneumococcal IgG levels, or opsonophagocytic activity.

We excluded paediatric studies; animal studies; case reports; studies that did not reported serological outcomes, and vaccination studies published before 2000, because pre- or early cART eras do not adequately reflect the current situation for PLWH.

The following studies were also included in the meta-analysis:



- o Studies reporting seroconversion rates (SCR) for serotype 6B, 14, and/or the overall seroconversion rate, 1-3 months after vaccination, following one or more of the following definitions:
  1. The n/total (%) of patients reaching a  $\geq 2$ -fold increase in IgG for serotype 6B, or the n/total (%) of patients reaching a  $\geq 2$ -fold increase AND IgG level  $\geq 1.00$   $\mu\text{g/ml}$  for serotype 6B.
  2. The n/total (%) of patients reaching a  $\geq 2$ -fold increase in IgG for serotypes 14, or the n/total (%) of patients reaching a  $\geq 2$ -fold increase AND IgG level  $\geq 1.00$   $\mu\text{g/ml}$  for serotype 14.
  3. The n/total (%) of patients reaching a  $\geq 2$ -fold increase for at least 50-70% of measured serotypes, or the n/total (%) of patients reaching a  $\geq 2$ -fold increase AND IgG level  $\geq 1.00$   $\mu\text{g/ml}$  for at least 50-70% of measured serotypes (overall SCR).
- o Studies comparing PPSV23 to PCV, or to the combination of PCV/PPSV23, and which reported baseline and post-vaccination GMCs with 95% confidence intervals 1-3 months after vaccination, for serotype 6B and/or 14. Studies from which the GMCs had to be extracted from graphs were excluded from meta-analysis.

### **Box 3: Methods for meta-analysis**

We obtained pooled SCRs for serotypes 6B, 14, and the overall SCR, and associated 95% confidence intervals (CI) in PLWH, after single PCV, multiple PCVs, PPSV23, and PCV/PPSV23 combined, using R version 3.5.0. package 'meta', command 'metaprop'. We used the  $I^2$  test to indicate the level of statistical heterogeneity between studies. Odds ratios for SCR-differences between vaccination regimens were calculated in RevMan version 5.3. GMCs for serotype 6B and 14, and their 95% confidence intervals, were log transformed, and the standard error was calculated from the log-transformed 95% confidence interval. Log transformed data were entered in RevMan 5.3, using the inverse variance method, to calculate the GMC differences between vaccination schedules (PCV versus PPSV23, and PCV/PPSV23 combined versus PPSV23).

In view of the sample size and considerable statistical heterogeneity we used the random-effects model for all meta-analyses. We depicted the results of our meta-analysis in Forest plots. Where appropriate, we used the 95% confidence interval (CI) to indicate statistical significance. In addition, prediction intervals were calculated for all Odds ratios from the comparative meta-analysis, because a CI

provides an incomplete summary of the underlying heterogeneity in meta-analysis, whereas prediction intervals show the range of true effects as can be expected from future studies. Last, subgroup analyses were performed to investigate the influence of study quality, cART use, and CD4-cell counts on effect estimates and heterogeneity.
